# Supplementary material for: Genetic Structure, Linkage Disequilibrium and Association Mapping of Verticillium Wilt Resistance in Elite Cotton (Gossypium hirsutum L.) Germplasm Population
Source: PLoS One. 2014 Jan 23;9(1):e86308. doi: 10.1371/journal.pone.0086308 (PMC3900507; doi:10.1371/journal.pone.0086308)
Supplement: Table S2 — Microsatellite markers used in the study, including the location of the markers in the cotton reference map and position based on the position references. a The chromosome locations were based on the the AD-genome wide Reference Map. b The positon information was based on position references. c Position references for the information of the SSR: A. Yu JZ; Kohel RJ; Fang DD; Cho J; Van Deynze A; Ulloa M; Hoffman SM; Pepper E; Stelly DM; Jenkins JN; Saha S;Kumpatla SP; Shah MR; Hugie WV; Percy RG. A High-Density Simple Sequence Repeat and Single Nucleotide Polymorphism Genetic Map of the Tetraploid Cotton Genome. G3: Genes, Genomes, Genetics Mission 2012 2(3): 43–58. B. Guo W; Cai C; Wang C; Han Z; Song X; Wang K; Niu X; Lu K; Shi B; Zhang T. A microsatellite-based, gene-rich linkage map reveals genome structure, function and evolution in gossypium. Genetics 2007 176(1): 527–541. C. Yu Y; Yuan D; Liang S; Li X; Wang X; Lin Z; Zhang X. Genome structure of cotton revealed by a genome-wide SSR genetic map constructed from a BC1 population between gossypium hirsutum and G. barbadense. BMC Genomics 2011 12:15. D. Shen X; Guo W; Lu Q; Zhu X; Yuan Y; Zhang T. Genetic mapping of quantitative trait loci for fiber quality and yield trait by RIL approach in Upland cotton. Euphytica 2007 155 371–380. E. Lacape JM, Jacobs J, Arioli T, Derijcker R, Forestier-Chiron N, Llewellyn D, Jean J, Thomas E, Viot C. A new interspecific, Gossypium hirsutum x G. barbadense, RIL population: towards a unified consensus linkage map of tetraploid cotton.Theor Appl Genet. 2009 119(2):281–92. F. Yu JW; Yu SX; Lu CR; Wang W; Fan SL; Song MZ; Lin ZX; Zhang XL; Zhang JF; Wu W. High-density Linkage Map of Cultivated Allotetraploid Cotton Based on SSR, TRAP, SRAP and AFLP Markers. Journal of Integrative Plant Biology. 2007 49: 716–724. H. Qin H; Guo W; Zhang YM; Zhang T. QTL mapping of yield and fiber traits based on a four-way cross population in Gossypium hirsutum L. Theor Appl Genet 2008 117:883–894. [file pone.0086308.s005.xlsx]

## Sheet: Sheet1
Supplementary Table 2: Microsatellite markers used in the study, including the location of the markers in the cotton reference map and position based on the position references.
Locus name	Chromosomea	Position(cM)b	Repeat Type	Position Ref c
CIR0009	1	125.895	(TG)6(N)1(TATG)6	A
DPL513	1	56.924	(GTAT)21	A
BNL2599	1	1.633	(AG)11	A
NAU3254	1	99.1	(GCA)5	B
NAU5107	1	50.7	(TGAAGA)4	B
NAU5163	1	78.3	(GAAGAG)4	B
BNL3971	2	78.322	(TC)15	C
TMB1738	2	9.988	(CA)27	C
NAU3419	2	3.4	(ACAT)6	B
NAU2265	2	5.4	(ACAT)10	B
NAU2277	2	4.4	ACAT(10)	B
NAU5233	3	108	(GAGTTG)7	B
NAU3839	3	106.2	(GAGTTG)5	B
NAU3541	3	57.9	(CAAGAA)5	B
NAU3995	3	107	(GATAGG)5	B
NAU1190	3	62.9	(GGC)6	B
NAU1071	3	35.1	(TTC)10	D
NAU1167	3	107.5	(GATAGG)4	B
BNL0530	4	66.9	(GA)10	B
CIR249	4	66.51	(CA)8+(N)3+(AT)7	E
NAU3592	4	119.269	(AT)8	C
HAU0086	4	53.766	(TA)7	C
BNL3089	4	137.254	(AG)10	C
MUCS0101	4	49.3	TCT(2)GAC(6)	F
NAU0934	5	199.4	(TC)11	B
NAU2274	5	133.7	(CAT)4	B
NAU3014	5	100.7	(TATG)4	B
CIR0253	5	177.6	(TC)15+(N)8+(AC)5+(N)7+(CA)8	B
CIR328	5	199.191	(CA)5	A
NAU3212	5	66	(AG)11	B
NAU4031	5	85.9	(CTG)8	H
NAU3828	5	24.1	(TA)7	B
BNL3400	5	2.616	(AC)23+(AT)2	A
NAU1269	5	0.4	(GCTCAG)3	H
NAU874	6	4.3	(AT)18	D
BNL1902	6	15.426	N/A	C
NAU5433	6	98.806	(GGAGCA)3	C
NAU2679	6	94.78	(AAT)17	C
CIR267	6	123.992	(AC)8+(N)2+(AC)4	A
NAU0905	6	50.834	(AAT )17	A
BNL1604	7	73	(AG)25	B
TMB1618	7	67.714	(CA)12	C
NAU1362	7	57.6	(ATA)6	B
NAU2862	7	38.4	(CTT)5	B
NAU1043	7	137.7	(TTC)14	F
BNL3255	8	76.5	(GC)6AT(AC)14	B
NAU3201	8	38.4	(CTCATT)6	B
NAU3499	8	65.3	(ATT)6+(AGT)9	B
DPL0222	9	137.829	(GAT)9+(CTT)7	A
NAU2723	9	134.1	(ATG)6	B
JESPR208	9	51.66	(CT)15	A
BNL1317	9	63.911	(AG)14	A
NAU2869	10	56.4	(AAT)19	B
BNL2960	10	68.8	(GA)10	B
BNL1231	11	30.464	(AG)15	C
NAU3074	11	183.689	(CAG)7	C
DPL0209	11	42.172	(ATG)10	C
BNL2805	11	98.327	(GA)10	C
NAU1014	11	73	(TCA)11	B
TMB0043	11	48.088	(GAA )11	A
BNL4011	11	136.826	(TG)12+(AG)4	A
TMB426	11	71.5	(GAA)6	B
CIR196	11	145.826	(TG)11	A
NAU980	11	169.5	(ACAT)9	B
NAU5428	11	32.076	(GAT)12	C
BNL1408	11	84.095	(AG)17	C
BNL1034	11	184.577	(CT)16	C
NAU3341	11	149.5	(ATAC)5	B
NAU5064	11	162.6	(CAT)6	B
NAU3695	11	125.6	(AT)7	B
TMB0628	11	89.477	(GAA)7	C
NAU5480	11	60.843	(TGA)9	C
NAU3703	11	67.3	(ATG)5+(AGG)4	B
BNL3442	11	205.555	(CA)14(TA)5	C
NAU4047	12	58.9	(CAC)5	B
NAU5351	13	42.8	(ATG)6	N
JESPR204	13	31.2	(CTT)20	B
NAU3468	13	46.9	(TGC)8	B
JESPR153	13	63.5	(CTA)18	B
BNL1421	13	70.6	(AG)29, (AG)14	B
NAU1141	13	88.2	(TCCATC)3	B
CIR246	14	112.1	(TG)6	B
NAU5467	14	90.3	(TCT)16	B
NAU3820	14	18.8	(GAA)19	B
NAU3242	14	54.2	(TA)11	B
NAU2437	15	118.5	(ATAC)8	B
BNL3085	15	17.3	(AG)15	P
BNL830	15	8	(AC)10	P
BNL2646	15	48.8	(TC)4+(CT)17	P
NAU2820	16	47.587	(TGGTGA)4	R
JESPR292	16	35.986	(CTT)7	R
BNL2441	16	76.567	(AG)12	R
NAU2627	16	62.301	(TA)7	R
BNL1694	16	78.221	(AG)19, (TC)19	A
BNL3319	16	57.702	N/A	R
NAU5408	16	79.476	(GAA)6	C
TMB1409	16	54.027	(GAA)11	A
BNL3496	16	168.5	(AC)11	P
NAU1020	16	117.81	(CTT)7	E
TMB1114	16	41.815	(CA)5 + (CA)4	C
BNL3793	16	87.297	(TG)15	C
BNL2734	16	78.538	(GA)31	C
BNL2766	16	43.202	N/A	C
NAU4956	16	90.562	(CTCTTC)7	C
NAU4030	16	18.842	(GGT)6	R
NAU3486	16	149.947	(TTTAT)4	C
NAU2931	16	88.676	(CAG)8	C
NAU5152	16	34.009	(TCT)9	R
NAU2887	16	60.867	(TCT)6	R
NAU5120	16	47.7	(TCACCA)5	R
NAU3608	16	121.465	(AATAT)5	R
NAU3053	16	102.986	(AT)13	C
BNL1026	16	79.597	N/A	R
CIR0347	17	100.715	(AT)6+(GT)7	A
BNL1606	17	51.762	(AG)15	R
HAU0119	17	0	(TCT)9	C
NAU3700	17	28.139	(GGAGGC)5	R
JESPR101	17	71.031	(TA)3(GT)15	A
NAU2859	17	86.286	(AT)7	R
CIR099	18	46.752	(GT)8	R
CIR216	18	102.992	(CA)9	A
JESPR56	18	56.882	(GAA)23	R
NAU3017	18	49.461	(CCCTAA)6	R
TMB1767	18	77.921	(GA)6+(TA)6	C
NAU2980	18	0	(TAGGAG)4	R
BNL3281	18	5.22	(TA)9+(GA)14	E
BNL1040	18	79.354	N/A	C
BNL243	18	111.085	(AG)22	R
NAU3609	19	4.091	(GGAT)4	R
NAU3110	19	146.828	(AGA)10	R
BNL1878	19	104.56	(AG)14	R
NAU4042	19	113.502	(TC)13	R
BNL4069	19	36.8	(GA)14	F
BNL4096	19	85.339	(GT)8+(GA)17	R
BNL3977	19	214.7	(TC)19	P
BNL3875	19	90.119	(TG)13	A
BNL2786	19	110.364	N/A	A
JESPR0001	19	123.567	(GAA)18	A
JESPR023	19	147.084	(CTT)9	A
TMB1615	19	70.662	(CA)13	A
JESPR236	19	138.307	(CT)22	A
CIR139	19	68.454	(TG)8	A
TMB189	19	68.522	(CA)24	A
NAU1221	19	62.861	(TCAAGC)5	A
NAU1102	19	0	(TCT)6	D
CIR219	19	68.629	(GT)25	A
CIR364	19	66.663	(AC)10	A
BNL3569	19	68.968	(CA)21	A
NAU2894	19	26.581	(GTAT)5	R
DPL0212	19	91.152	(TCA)8	A
NAU1042	19	63.445	(TCAGGC)4	A
NAU2741	19	96.683	(TTC)7	R
BNL3646	20	3.479	(TC)14	A
CM45	20	36.646	(AG)17	A
NAU3574	20	58.598	(AAAG)4	R
BNL3649	21	10.8	(TC)20	H
BNL1053	21	67.189	(AC)16	A
JESPR158	21	62.821	(CTT)12	A
NAU1103	21	7.2	(AGC)7	H
NAU2783	22	81.217	(AC)9	C
BNL4030	22	57.523	(GT)10	C
NAU3100	23	25.838	(TTC)7	R
NAU2954	23	114.846	(GAGCGG)5	R
BNL3823	23	49.534	N/A	R
BNL2977	23	72.227	(AT)8+(AG)11	C
BNL1414	23	123.552	(AG)16	R
JESPR151	23	56.451	(GAA)9(Y)4(GAA)10	R
JESPR114	23	135.791	(GT)12	R
JESPR110	23	116.938	(GA)16	R
JESPR274	23	52.972	(CA)13	R
NAU1047	23	97.1	(CCA)7	H
CIR286	23	18.007	(AC)7	R
NAU3414	23	141.828	(GAA)6	R
NAU4079	23	60.19	(TCA)9	R
NAU2753	23	61.058	(CGG)5	R
NAU3732	23	47.447	(CT)12	R
NAU5189	23	140.669	(TTC)8	R
NAU5350	23	66.631	(ATG)8	R
NAU5335	24	93.958	(ACATAT)9	R
DPL0068	24	81.606	(AG)27+(GGGA)2	C
DPL0461	24	84.291	(ATA)16	C
NAU3786	24	50.486	(ATGG)4	R
BNL3806	25	48.5	(TG)18, (AG)18	D
JESPR50	25	146.9	(CAA)5	D
NAU2641	25	92.103	(TA)4+T+(TA)6	R
NAU3588	25	64.684	(GTA)7	C
BNL827	25	119.951	(CA)19	R
NAU3291	26	76.029	(AG)14	R
NAU3305	26	101.709	(TA)14+(GA)4+AA+(GA)7	R
NAU3236	26	65.616	(ACA)5	R
NAU3862	26	26.182	(GCA)7	R
NAU4912	26	67.201	(TTC)7	R
NAU2868	26	94.685	(AT)12	R
NAU5463	—	—	(TCC)9
BNL2985	—	—	N/A
DPL0212	—	—	(TCA)8
NAU2684	—	—	(GTG)7
Gh268	—	—	TCT(11)
Gh454	—	—	AGA(7)
MGHES18	—	—	(AT)13
MUSS138	—	—	TCT(6)
NAU1085	—	—	(CAATCC)3
NAU1186	—	—	(CGTCAC)3
TMB2945	—	—	(CCCTCT)4
NAU3563	—	—	(ATG)7
DPL0249	—	—	(TCA)8
E38644 d	—	—	—
w11330	—	—	—
73686-3	—	—	—
6738-1	—	—	—
1DF e	—	—	—
1EF	—	—	—
a The chromosome locations were based on the the AD-genome wide Reference Map . b The positon information was based on position references. c Position references for the information of the SSR: A. Yu JZ; Kohel RJ; Fang DD; Cho J; Van Deynze A; Ulloa M; Hoffman SM; Pepper AE; Stelly DM; Jenkins JN; Saha S;Kumpatla SP; Shah MR; Hugie WV; Percy RG. A High-Density Simple Sequence Repeat and Single Nu…
