# Supplementary material for: Genetic Structure, Linkage Disequilibrium and Association Mapping of Verticillium Wilt Resistance in Elite Cotton (Gossypium hirsutum L.) Germplasm Population
Source: PLoS One. 2014 Jan 23;9(1):e86308. doi: 10.1371/journal.pone.0086308 (PMC3900507; doi:10.1371/journal.pone.0086308)
Supplement: Table S3 — Proportional memberships in groups as defined by Structure. (XLSX) [file pone.0086308.s006.xlsx]

## Sheet: Sheet1
Supplementary Table 3 Proportional memberships in groups as defined by Structure
ID	Accesions	Groups	G1	G2
59	Nongjiu	G1	0.989	0.011
63	Acala(big boll)B	G1	0.989	0.011
66	Big boll cotton	G1	0.987	0.013
167	Soviet Union 8911	G1	0.985	0.015
165	MM-2	G1	0.98	0.02
255	r4136	G1	0.98	0.02
180	PAR-51	G1	0.978	0.022
137	Liao4853	G1	0.976	0.024
10	Jin444	G1	0.972	0.028
230	Soviet Union 116	G1	0.968	0.032
139	Liaomian17	G1	0.967	0.033
235	Ji91-12	G1	0.966	0.034
9	Huaimian4	G1	0.962	0.038
280	PD6186	G1	0.957	0.043
12	KucheT94-6	G1	0.954	0.046
140	Liaomian18	G1	0.95	0.05
22	Han8959	G1	0.94	0.06
184	Acala SJ-1	G1	0.937	0.063
70	New big boll	G1	0.922	0.078
161	GP83	G1	0.911	0.089
83	Songzi big boll	G1	0.909	0.091
85	Nashangqudahua	G1	0.897	0.103
262	MSCO-11	G1	0.874	0.126
130	Zhong870203	G1	0.845	0.155
113	Qik	G1	0.825	0.175
328	Bazhou7416	G1	0.82	0.18
128	Shan960329-2yuan3	G1	0.816	0.184
67	Big boll cotton 69	G1	0.808	0.192
168	AC239	G1	0.794	0.206
263	Jing55263	G1	0.786	0.214
136	Liao4835	G1	0.784	0.216
295	Zhongmian12	G1	0.767	0.233
155	Arcot402bne	G1	0.763	0.237
285	Xushidatao	G1	0.757	0.243
157	Arcot438	G1	0.749	0.251
46	Soviet Union 21	G1	0.745	0.255
106	CZA(70)33	G1	0.741	0.259
77	ZhongAR683-77	G1	0.739	0.261
253	DP2156	G1	0.728	0.272
179	LAPAR45	G1	0.723	0.277
138	Liaomian16	G1	0.718	0.282
284	353 big boll	G1	0.711	0.289
54	S-050031	G1	0.697	0.303
5	Changde184	G1	0.695	0.305
182	AfricaE40	G1	0.695	0.305
29	Mianyang73-39	G1	0.691	0.309
27	Ari-327	G1	0.69	0.31
72	ZhongＲ773-72	G1	0.671	0.329
2*6	ZhongR03	G1	0.655	0.345
299	Zhongmian50	G1	0.653	0.347
103	Zhong2108	G1	0.65	0.35
225	Chad3	G1	0.642	0.358
220	BPA68	G1	0.617	0.383
189	RNX189	G1	0.616	0.384
115	MeiG-84	G1	0.605	0.395
317	99633	G1	0.604	0.396
80	Big peach cotton	G1	0.6	0.4
114	MeiG-82	G1	0.6	0.4
124	Verticillium wilt-resistance164	Mixed	0.599	0.401
327	Ari-327	Mixed	0.597	0.403
291	LineF	Mixed	0.58	0.42
58	Neihuangdazi	Mixed	0.555	0.445
243	GK99-1	Mixed	0.538	0.462
132	ZhongzhiBD13	Mixed	0.534	0.466
238	Ji91-32	Mixed	0.503	0.497
93	Xingtai6	Mixed	0.5	0.5
166	MeiD#1	Mixed	0.499	0.501
172	Zhongzi04184	Mixed	0.497	0.503
261	RT white fiber	Mixed	0.494	0.506
241	Liao96-23-30	Mixed	0.492	0.508
191	Ao152	Mixed	0.487	0.513
8	Hu749513	Mixed	0.482	0.518
266	Wangjiang long lint cotton	Mixed	0.473	0.527
186	L142-9	Mixed	0.472	0.528
245	DP410B	Mixed	0.463	0.537
209	DP33B	Mixed	0.459	0.541
282	MSCO-12	Mixed	0.454	0.546
26	Jing55263	Mixed	0.45	0.55
55	Jihan2	Mixed	0.447	0.553
94	Shannong3	Mixed	0.437	0.563
123	Han8944	Mixed	0.434	0.566
216	Beiersinuo	Mixed	0.433	0.567
169	M-8124-1159	Mixed	0.407	0.593
84	GP70	Mixed	0.406	0.594
88	Linqing201	Mixed	0.402	0.598
320	Ari-320	G2	0.399	0.601
281	Gaoyimian	G2	0.389	0.611
38	Yahuang9103	G2	0.386	0.614
158	Coker139	G2	0.384	0.616
201	Shenmian5	G2	0.384	0.616
117	Han109	G2	0.379	0.621
264	Lu458	G2	0.377	0.623
111	N74-250	G2	0.376	0.624
108	GP93	G2	0.367	0.633
307	Zhong507145	G2	0.362	0.638
121	JCG59	G2	0.361	0.639
48	Suxu138	G2	0.359	0.641
16	Sunong6	G2	0.344	0.656
287	Xinyan96-48	G2	0.341	0.659
62	Xiaoxian big boll	G2	0.333	0.667
150	Zhongyuan9112	G2	0.325	0.675
171	Mei8123	G2	0.322	0.678
229	Zhongzi9103	G2	0.319	0.681
181	Sudan2	G2	0.309	0.691
69	Qifeng big boll	G2	0.301	0.699
203	Zhong1276	G2	0.296	0.704
207	UA887	G2	0.292	0.708
127	Shan3184	G2	0.291	0.709
144	Zhongyuan9114	G2	0.285	0.715
118	Zhongmian32	G2	0.283	0.717
145	Zhongyuan9115	G2	0.275	0.725
60	Xiangfendatao	G2	0.274	0.726
163	Zhong89-1	G2	0.263	0.737
91	Zhong5913-2	G2	0.255	0.745
141	Yongji1号	G2	0.229	0.771
24	Ji91-31	G2	0.22	0.78
76	ZhongArc-76	G2	0.209	0.791
164	Miscot78-27	G2	0.206	0.794
44	Zhongyuan9114	G2	0.202	0.798
98	Xuzhoubanbanmian	G2	0.199	0.801
269	Xuzhou261	G2	0.195	0.805
107	DES926	G2	0.194	0.806
151	Yumian2067	G2	0.193	0.807
237	Ji85-3	G2	0.188	0.812
143	Zhongyuan9111	G2	0.181	0.819
112	Mei28114-313	G2	0.17	0.83
13	Shamaochangtao	G2	0.169	0.831
270	Handan333	G2	0.166	0.834
277	Sumian2	G2	0.157	0.843
288	Yumian2	G2	0.145	0.855
199	SuTKH-1	G2	0.127	0.873
90	Yu284	G2	0.097	0.903
311	ZhongAR-RNX311	G2	0.085	0.915
15	Su7036	G2	0.078	0.922
312	ZhongG5	G2	0.066	0.934
173	Acala SJ-4	G2	0.065	0.935
96	Xingtai79-11	G2	0.06	0.94
116	GK22	G2	0.057	0.943
31	Sha24-3	G2	0.044	0.956
227	Handan568	G2	0.041	0.959
222	Zhong9708-222	G2	0.034	0.966
174	Arcot-1	G2	0.032	0.968
135	Zhongzi640	G2	0.029	0.971
211	Yumian９(Yuzao1109)	G2	0.027	0.973
276	Zhengzhou long lint cotton	G2	0.027	0.973
110	N73DeltapineNGF	G2	0.026	0.974
185	ZhongArc-185	G2	0.026	0.974
218	Simian2	G2	0.025	0.975
213	ST474	G2	0.023	0.977
89	Lumian11(3389)	G2	0.021	0.979
240	FB20	G2	0.018	0.982
45	Shiyuan638	G2	0.016	0.984
265	Yumian19	G2	0.014	0.986
32	Soviet Union8908	G2	0.011	0.989
51	ZhongARR40682	G2	0.011	0.989
73	Acala SJ-4	G2	0.011	0.989
99	Yancheng1115	G2	0.011	0.989
308	ZhongArc-308	G2	0.01	0.99

## Sheet: G1
5
9
10
12
22
27
29
46
54
59
63
66
67
70
72
77
80
83
85
103
106
113
114
115
128
130
136
137
138
139
140
155
157
161
165
167
168
179
180
182
184
189
220
225
230
235
253
255
262
263
280
284
285
295
299
317
328
2*6

## Sheet: G2
13
15
16
24
31
32
38
44
45
48
51
60
62
69
73
76
89
90
91
96
98
99
107
108
110
111
112
116
117
118
121
127
135
141
143
144
145
150
151
158
163
164
171
173
174
181
185
199
201
203
207
211
213
218
222
227
229
237
240
264
265
269
270
276
277
281
287
288
307
308
311
312
320
